# Supplementary material for: Localization-specific distributions of protein pI in human proteome are governed by local pH and membrane charge
Source: BMC Mol Cell Biol. 2019 Aug 20;20:36. doi: 10.1186/s12860-019-0221-4 (PMC6701068; doi:10.1186/s12860-019-0221-4)
Supplement: Supplementary file 1 — Table S1. A dataset of experimentally observed lysosomal proteins. (XLSX 52 kb) [file 12860_2019_221_MOESM1_ESM.xlsx]

## Sheet: Sheet1
UNI Prot	Annotation	MW	pI
Q9BZC7-1	Uniprot, Go	269873	6.38
Q9BZC7-3	Uniprot, Go	269988	6.38
Q9NP78-1	Uniprot, Go	84475	8
Q9NP78-2	Uniprot, Go	79771	8.62
Q9NP78-5	Uniprot, Go	75402	6.77
Q9NP78-6	Uniprot, Go	75284	6.78
Q5T3U5-1	Go	161629	6.64
Q5T3U5-2	Go	158781	6.89
P11117	Uniprot, Go	48344	6.28
P13686	Uniprot, Go	36599	8.82
P15309-2	Uniprot, Go	48336	6.54
P15309-1	Uniprot, Go	44566	5.83
P15309-3	Uniprot, Go	40443	5.65
P20933	Uniprot, Go	37208	5.86
Q9P2R3-1	Go	128399	5.7
Q9P2R3-2	Go	128486	5.7
Q09666-1	Go	629101	5.8
Q09666-1	Go	16061	5.32
Q59E93-1	Go	110593	5.35
P15144	Go	109540	5.31
O43747-1	Go	91351	6.36
O43747-2	Go	91723	6.36
O00203-1	Go	121320	5.75
O14617-1	Go	130158	8.69
O14617-2	Go	125040	6.58
O14617-3	Go	111238	8.31
O14617-4	Go	114707	8.19
O14617-5	Go	136651	7.54
Q9Y2T	Go	46939	6.47
Q96BM9	Uniprot, Go	21416	7.63
Q9NVJ2	Uniprot, Go	21539	8.67
P15289-1	Uniprot, Go	53588	5.65
P15848-1	Uniprot, Go	59687	8.43
Q96EG1	Uniprot, Go	57061	6.16
A8K0B6	Go	44674	7.54
Q13510-1	Uniprot, Go	44660	7.52
Q13510-2	Uniprot, Go	46504	7.99
P98196	Go	129756	6.17
Q8NB49-1	Go	129477	6.25
Q8NB49-2	Go	128040	6.02
Q9NQ11-1	Uniprot, Go	128794	8.47
Q9NQ11-2	Uniprot, Go	125977	8.43
Q9NQ11-3	Uniprot, Go	128323	8.47
Q93050-1	Go	95756	6.22
Q93050-2	Go	96413	6.01
Q9Y487	Go	98082	6.18
Q9HBG4	Go	96386	5.74
P27449	Go	15736	7.98
P61421	Go	40329	4.89
P38606-1	Go	68304	5.34
P21281	Go	56501	5.57
P21283	Go	43942	7.02
Q8NEY4-1	Go	48759	5.82
Q8NEY4-2	Go	43865	5.84
Q9Y5K8	Go	28263	9.36
P36543-1	Go	26145	7.7
P36543-3	Go	22706	6.65
O75348	Go	13758	8.93
B3KUZ7	Go	55911	6.07
Q9UI12-1	Go	55883	6.07
Q9UI12-2	Go	54151	6.06
Q96DM3	Uniprot, Go	74975	7.89
Q6NUT3-1	Go	52075	8.67
Q6NUT3-2	Go	51030	8.45
Q8WWB7	Uniprot, Go	43864	6.1
Q8N357	Uniprot, Go	40214	6.44
P86791	UniProt, Go	55866	6.06
P08962-1	UniProt, Go	25637	8.14
P08962-2	UniProt, Go	23430	8.17
P08962-3	UniProt, Go	17271	8.11
P34810-1	UniProt, Go	37408	9.1
P34810-2	UniProt, Go	31738	9.06
P34810-3	Uniprot, Go	34654	9.06
Q9NZK5-1	Go	58934	7.75
Q9NZK5-2	Go	30668	6.05
P51795-1	Go	83147	6.37
P51795-2	Go	90785	5.81
P51797-1	Go	97289	6.39
P51797-2	Go	36006	7.77
P51797-3	Go	38814	5.91
P51797-4	Go	34515	6.53
P51798-1	UniProt, Go	88679	8.66
Q13286-1	UniProt, Go	47623	5.93
Q13286-2	UniProt, Go	42829	5.82
Q13286-3	UniProt, Go	45570	6.17
Q13286-4	UniProt, Go	34569	6.13
Q13286-5	UniProt, Go	28016	8.91
Q13286-6	UniProt, Go	37969	5.79
O75503	UniProt, Go	41497	7.04
P12109	Go	108529	5.26
A5PL27	Go	122205	5.44
Q9H3G5	Go	54164	5.39
O75629	Go	24075	7.06
Q01459	UniProt, Go	43760	6.19
O60931-1	UniProt, Go	41738	9.12
O60931-2	UniProt, Go	45039	9.53
P10619 -1	UniProt, Go	54466	6.16
P10619 -2	UniProt, Go	52489	6.51
P07858	UniProt, Go	37822	5.88
P53634-1	UniProt, Go	51854	6.53
P53634-2	UniProt, Go	15169	5.41
P07339	UniProt, Go	44552	6.1
Q9UBX1	UniProt, Go	53366	8.52
P09668	UniProt, Go	37394	8.35
P43235	UniProt, Go	36966	8.72
P07711	UniProt, Go	37564	5.32
Q9HBQ7	UniProt, Go	16839	4.46
P43234	UniProt, Go	35957	7.06
P25774-1	UniProt, Go	37495	8.61
Q9UBR2	UniProt, Go	33868	6.7
Q8NBI2-1	UniProt, Go	27214	9.64
Q8NBI2-2	UniProt, Go	29186	9.62
Q8NCG7-1	Go	73732	6.09
Q2VPB7	Go	93949	5.61
O75140-10	Uniprot, Go	181264	6.27
O75140-9	Uniprot, Go	180404	6.27
O75140-10	Uniprot, Go	177910	6.27
O75165	UniProt, Go	254415	6.31
Q9H3Z4-1	Go	22149	4.93
O00115-1	UniProt, Go	39581	8.3
P27487	Go	88279	5.67
Q9UHL4	Uniprot, Go	54341	5.91
P42892-1	Go	87164	5.61
P42892-2	Go	85808	6.08
P42892-3	Go	85562	5.55
P42892-4	Go	87022	5.55
P01133-1	Go	133994	5.53
P01133-2	Go	129256	5.44
P08246	Go	28518	9.71
Q07075	Go	109244	5.31
P22413	Go	104924	6.76
Q9Y227-1	UniProt	70255	8.55
Q9Y227-2	UniProt	69421	8.55
Q9UM22-1	Go	25437	6.33
Q9UM22-2	Go	9861	10.42
Q9UM22-3	Go	18672	5
Q5ST80	Go	47355	7.08
Q14254	UniProt, Go	47064	5.19
P04066	UniProt, Go	53689	6.37
Q9BTY2-1	Go	54067	5.84
P10253	UniProt, Go	105324	5.62
P54803-1	UniProt, Go	77063	6.17
P54803-3	UniProt, Go	74294	6.08
P54803-4	UniProt, Go	74764	6.47
P54803-5	UniProt, Go	67184	6.93
P34059	UniProt, Go	58026	6.25
B7Z6S9	UniProt, Go	68761	8.15
P04062-1	UniProt, Go	59716	7.29
P04062-2	UniProt, Go	57455	7.29
P04062-3	UniProt, Go	29897	6.48
Q9NXN4-1	Go	56225	5.48
Q9NXN4-1	Go	56049	5.78
Q92820	UniProt, Go	35964	6.66
Q53Y83	Go	48767	5.35
P16278-1	UniProt, Go	76075	6.1
P16278-2	UniProt, Go	60536	6.5
P17900	UniProt, Go	20838	5.17
P29992	Go	42123	5.51
P63096-1	Go	40361	5.69
P63096-2	Go	34775	5.51
P08754	Go	40532	5.5
P50148	Go	42142	5.48
P62873 -1	Go	37377	5.6
Q6FHM2	Go	37331	5.6
Q9HAV0	Go	37567	5.59
Q7Z3X3	UniProt, Go	56346	8.13
P15586-1	Uniprot, Go	62082	8.6
P80108-1	Go	92336	5.91
P80108-2	Go	19865	6.07
P28799-1	Go	63544	6.43
P28799-2	Go	46991	6.75
P08236-1	UniProt, Go	74732	6.54
P08236-2	UniProt, Go	69142	6.48
P06865-1	UniProt, Go	60703	5.04
P07686	UniProt, Go	63111	6.29
Q68CP4-1	UniProt, Go	73293	8.69
Q68CP4-2	UniProt, Go	70496	8.27
Q9Y251-1	UniProt, Go	61149	9.32
Q9Y251-2	UniProt, Go	54734	9.56
Q9Y251-3	UniProt, Go	53161	9.45
Q9Y251-4	UniProt, Go	42791	8.89
Q12794-1	UniProt, Go	48368	6.31
Q12794-2	UniProt, Go	45145	7.05
Q12794-3	UniProt, Go	27958	7.55
Q12794-4	UniProt, Go	23338	6.04
Q12794-5	UniProt, Go	19367	6.5
Q12794-6	UniProt, Go	10435	8.91
Q12891	Go	53860	8.47
P22304-1	UniProt, Go	61873	5.21
P22304-2	UniProt, Go	38310	5.98
P35475-1	UniProt, Go	72670	9.25
P13284	UniProt, Go	27964	4.79
A8K5C2	Go	51075	5.95
Q6P9B6	Go	50994	5.81
P11279-1	UniProt, Go	44882	9
P13473-1	UniProt, Go	44961	5.35
P13473-2	UniProt, Go	44956	5.43
P13473-3	UniProt, Go	45170	5.6
Q9UQV4	UniProt, Go	44346	8.64
Q9Y2Q5-1	UniProt, Go	13508	5.3
Q9Y2Q5-3	UniProt, Go	10242	4.36
Q15012	Go	26801	6.1
Q13571	UniProt, Go	29937	8.95
Q99538-1	UniProt, Go	49411	6.07
P38571-1	UniProt, Go	45419	6.42
Q99732-1	UniProt, Go	17107	5.99
Q99732-2	UniProt, Go	23903	7.67
Q9NUN5-1	UniProt, Go	61389	7.89
Q9NUN5-3	UniProt, Go	53435	7.95
Q9UIQ6 -1	Go	117349	5.5
Q9UIQ6 -2	Go	115636	5.5
Q9UIQ6 -3	Go	115062	5.53
Q59FG2	Go	262019	5.14
Q07954	Go	504606	5.16
Q7Z5C0	Go	521932	4.88
P98164	Go	521958	4.89
Q7Z5C1	Go	521982	4.88
O00754-1	UniProt, Go	113744	6.84
Q9Y2E5-1	Go	113979	6.74
O00462	UniProt, Go	100895	5.33
Q9GZU1	UniProt, Go	65022	6.9
Q8NHS3-1	Uniprot, Go	57628	6.41
Q8NHS3-2	Uniprot, Go	17092	9.33
Q9NXC5-1	UniProt, Go	998584	6.19
Q9NXC5-2	UniProt, Go	64016	5.92
Q7L1V2-1	Go	59217	5.88
P05164-1	UniProt, Go	83869	9.19
P05164-2	UniProt, Go	78854	9.3
P05164-3	UniProt, Go	87249	9.29
P42345	UniProt, Go	288892	6.73
Q96A32	Go	19015	4.88
Q02083 -1	UniProt, Go	40066	8.88
Q02083 -2	UniProt, Go	35963	7.06
P17050	UniProt, Go	46565	4.98
P54802	UniProt, Go	82266	6.2
Q6FHY4	Go	34746	5.3
Q92542	Go	78411	5.67
Q99519	UniProt, Go	45467	5.59
Q8WWR8-2	UniProt, Go	52938	8.23
Q8WWR8-1	UniProt, Go	51572	7.97
O15118-1		142167	5.17
P61916	UniProt, Goi	16570	7.57
P46459-1	Go	82594	6.52
Q86WC4	UniProt, Go	37257	5.69
Q99571-1	G0	43369	8.29
Q99571-3	Go	40481	8.74
Q9UHG3	UniProt, Go	56640	5.8
Q9Y646	UniProt, Go	51888	5.79
Q9BTU6	UniProt, Go	54022	8.51
Q8NCC3	UniProt, Go	46658	6.26
Q6P4A8	UniProt, Go	63255	9.11
Q8NHP8	UniProt, Go	65472	6.34
Q59EA4	Go	122009	8.9
Q13393-1	Go	124184	8.91
Q13393-2	Go	119693	8.88
Q13393-3	Go	68898	9.39
Q13393-4	Go	112184	9.17
P50897	UniProt, Go	34194	6.07
Q9UMR5-1	UniProt, Go	34225	5.87
Q9UMR5-2	UniProt, Go	34055	6.45
P42785	UniProt, Go	55800	6.76
P24158	UniProt	27807	8.72
P07602-1	UniProt, Go	58113	5.06
P07602-2	UniProt, Go	58356	5.03
P07602-3	UniProt, Go	58484	5.03
P61106	Go	23897	5.85
P61019	Go	23546	6.08
P51148	Go	23483	8.64
Q9HBH5	Go	36865	9.02
O00584-1	UniProt, Go	29481	6.66
O00584-2	UniProt, Go	14000	6.4
O43567	UniProt, Go	42814	4.83
Q8N122-1	UniProt, Go	149038	6.43
Q8N122-2	UniProt, Go	43256	7.92
Q8N122-3	UniProt, Go	131515	6.6
Q7L523	UniProt, Go	36566	7.62
Q5VZM2-1	UniProt, Go	43250	5.85
Q5VZM2-2	UniProt, Go	40172	5.77
Q8WTV0-3	Go	60878	8.55
Q8WTV0-1	Go	56973	8.17
Q8WTV0-2	Go	45103	8.21
Q8WTV0-4	Go	53579	6.83
Q14108-1	UniProt, Go	54290	5
P51688	UniProt, Go	56695	6.46
Q9HAT2	UniProt, Go	58315	6.93
Q8NBJ9	UniProt, Go	94454	6.55
P49281-1	Go	62266	5.72
P49281-2	Go	61456	6.02
P49281-3	Go	64704	6.79
Q9UP95-1	Go	120650	6.02
Q9UP95-2	Go	118620	6.23
Q9UP95-3	Go	112275	6.06
Q9UP95-4	Go	84701	5.75
B4DF30	Go	119980	6.02
Q8IY34	UniProt, Go	63560	9.27
Q9NRA2-1	UniProt, Go	54640	8.51
Q9NRA2-2	UniProt, Go	30667	8.28
Q9BZD2	UniProt, Go	51815	7.95
Q9NY64	Go	50819	7.55
Q9BRI3-1	UniProt, Go	35178	5.7
Q9BRI3-2	UniProt, Go	40564	5.9
Q7Z2H8-1	UniProt, Go	53076	6.54
Q7Z2H8-2	UniProt, Go	43487	7.98
Q7Z2H8-3	UniProt, Go	27278	7.65
Q8IWA5-1	Go	80124	8.89
Q8IWA5-2	Go	80737	8.57
Q8IWA5-3	Go	79846	8.85
P17405-1	UniProt, Go	69752	6.9
P17405-2	UniProt, Go	64889	7.59
P17405-3	UniProt, Go	63511	7.59
P17405-4	UniProt, Go	69624	6.76
Q96JI7	Go	278868	5.63
Q9NRA0-1	UniProt, Go	69217	6.47
Q9NRA0-2	UniProt, Go	65205	6.65
Q9NRA0-3	UniProt, Go	65170	8.72
Q9NRA0-5	UniProt, Go	80205	7.61
Q9H2V7-1	Go	56630	6.19
Q9H2V7-2	Go	51333	6.39
Q9H2V7-3	Go	49013	7.66
Q8TCT8	UniProt, Go	58143	8.56
Q14849	Go	50502	8.53
O95772-1	Go	26655	4.75
O95772-2	Go	25818	4.79
O15400	UniProt, Go	29816	5.41
Q13488	Go	92968	6.66
O15455	Go	103829	6.73
Q969X1	UniProt, Go	34607	7.6
Q9BSA9-1	UniProt, Go	55615	7.61
Q9BSA9-2	UniProt, Go	42847	8.7
Q8IY95	UniProt, Go	30922	8.13
Q86T03-1	UniProt, Go	29470	9.24
Q86T03-3	UniProt, Go	15191	6.82
O94886	UniProt, Go	92126	6.98
Q96NL1	UniProt, Go	33338	5.12
Q9HCN3	UniProt, Go	84761	7.67
Q9P0T7	UniProt, Go	20574	6.27
O14773	UniProt, Go	61248	6.01
Q3MIH3	Go	14728	9.87
P51809-1	UniProt, Go	24935	8.86
P51809-2	UniProt, Go	30217	8.65
P51809-3	UniProt, Go	20121	9.39
Q6EMK4	Go	71713	7.16
Q9H270	UniProt, Go	107837	6.6
Q9H269	UniProt, Go	94694	6.32
Q9P253	UniProt, Go	110186	5.72
Q96AX1	UniProt, Go	67611	6.5
Q96QK1	Go	91707	5.32
Q96JC1-1	UniProt, Go	101809	6.53
Q96JC1-2	UniProt, Go	100769	6.67
P49754-2	UniProt, Go	98566	5.56
P49754-2	UniProt, Go	92846	5.34
Q9BZH6	Go	136685	6.48
Q9HAD4	Go	51728	5.25
Q68DK2-1	Go	284576	5.97
Q68DK2-5	Go	278335	5.88
