# Supplementary material for: Localization-specific distributions of protein pI in human proteome are governed by local pH and membrane charge
Source: BMC Mol Cell Biol. 2019 Aug 20;20:36. doi: 10.1186/s12860-019-0221-4 (PMC6701068; doi:10.1186/s12860-019-0221-4)
Supplement: Supplementary file 3 — Table S3. A dataset of extra-alkaline proteins in the human proteome. (XLSX 59 kb) [file 12860_2019_221_MOESM3_ESM.xlsx]

## Sheet: Sheet1
Id	Length	pI	MW
gi_767908050	750	11.86	80768.3
gi_1034564353	400	12.57	41849.2
gi_10863967	221	11.59	23522.3
gi_216548627	247	11.76	26093
gi_262527283	64	12.11	6821.7
gi_1034564521	146	12.02	15010.1
gi_284005028	230	12.14	24955.4
gi_578798556	185	11.66	20596.7
gi_1034556269	145	12.12	15361.7
gi_1034564531	217	12.13	23881.3
gi_1034563010	361	11.8	37557.7
gi_767905186	167	11.79	18238.8
gi_1034561520	71	11.59	7972.6
gi_16905517	262	11.72	31299
gi_530360783	918	12.32	103976
gi_1034554585	943	12.21	106023
gi_1012443684	290	12.24	33611.6
gi_530361091	227	11.91	23480.5
gi_578799981	355	11.64	40160.6
gi_767904323	318	11.53	33997.6
gi_767905565	464	11.82	53248
gi_21361282	494	12	56675.5
gi_543173109	168	11.67	19049.3
gi_1034564357	276	12.63	29368.1
gi_767908062	360	12.45	39071.5
gi_209954778	228	12.18	23615.1
gi_767907636	150	11.82	15778
gi_767907834	146	12.41	15384.6
gi_1034562611	333	11.78	35630.7
gi_1034562595	363	11.69	38794.2
gi_1034565177	277	12.14	28090.2
gi_400529120	125	11.67	12720.1
gi_1034558831	240	12.6	26276.1
gi_1034564114	268	12.55	29149.8
gi_397140105	299	12.34	32165.9
gi_1034556289	182	11.63	19368.6
gi_183076548	136	11.75	15387.4
gi_4504323	103	11.84	11366.9
gi_1034554502	353	11.71	37581.5
gi_331028739	249	12.72	26523.7
gi_1034557616	203	12.46	22045.7
gi_1012282560	218	11.92	22651.5
gi_11559927	128	11.89	15138.1
gi_767910469	194	11.93	20403.2
gi_1034560049	795	11.64	87463.9
gi_1034560045	839	11.53	92640.5
gi_1034564370	452	11.78	48215.9
gi_767912944	517	11.53	53635.2
gi_46409434	237	12.07	24355.2
gi_648216293	112	11.7	11764.7
gi_4502775	140	12.19	15989.9
gi_109637779	114	12.44	13000.6
gi_75677394	214	11.8	23307.5
gi_4507803	124	12.18	13457.9
gi_72534660	238	12.3	27365.1
gi_1034618337	661	11.98	69093.1
gi_1034618339	251	11.81	27016.5
gi_1034618341	187	11.57	20263.5
gi_24307919	155	12.1	18859.3
gi_7706621	284	11.56	30250.2
gi_22035592	188	11.76	21513.5
gi_578803417	337	11.8	35318.7
gi_1034618344	309	12.58	32831.4
gi_1034618346	404	12.32	43366.3
gi_1034618348	409	12.16	43724.1
gi_767919879	186	11.72	20245.4
gi_767919873	251	11.73	25932.4
gi_530369348	204	12.25	22314.7
gi_1034616026	183	12.11	19554.9
gi_530369346	246	11.78	26181.1
gi_1034617567	342	11.61	36582.5
gi_1034617569	318	11.78	34228.9
gi_1034617584	248	11.58	27133.4
gi_385198102	272	11.65	29504.9
gi_1034619461	152	11.96	16333.5
gi_116284398	503	11.95	51255.8
gi_767917847	324	11.89	34926.8
gi_1034619641	182	12.46	19912.5
gi_767921509	221	12.23	23284.9
gi_1034619698	158	12.97	16806.5
gi_4507629	55	12.57	6424.1
gi_767919973	299	12.39	32731.5
gi_767918982	238	12.42	25669.2
gi_7705680	87	12.14	9639
gi_124249376	389	12.01	42239.2
gi_1034618360	500	12.13	52345.9
gi_1034637029	226	11.92	23865.2
gi_4506635	135	11.81	15859.2
gi_358356407	145	12	16716.7
gi_15431293	204	12.09	24145.2
gi_767925030	168	11.51	18157.2
gi_507417942	206	11.86	23379.7
gi_507417944	183	11.83	20958.1
gi_15082240	112	12.05	12145.8
gi_176866318	290	12.22	30422.6
gi_153791662	467	12.28	49645.8
gi_1034637032	251	12.2	26509.4
gi_530372526	127	12.05	15460.7
gi_4506629	159	12.15	17751.3
gi_767923294	159	11.67	18373.6
gi_767925433	431	12.51	45931.7
gi_4506619	157	11.74	17778.2
gi_1034636596	165	11.93	16444.7
gi_767928350	181	11.58	19819.2
gi_24475863	346	11.76	35811.7
gi_150170683	175	11.82	18624.1
gi_7657552	66	11.51	7373.5
gi_38488727	334	11.57	38675.2
gi_767928904	226	11.82	24580.4
gi_1034631485	281	11.82	30640.2
gi_1034632560	219	12.11	22397.5
gi_4759098	288	11.69	33664
gi_16579830	51	12.89	6292.3
gi_767927282	137	12.21	15185.6
gi_1034634984	230	12.43	24443.5
gi_42716295	318	12.26	35817
gi_16117791	110	11.51	12537.2
gi_1034642175	507	11.86	55653
gi_1034642371	193	12.12	19824.4
gi_44662803	271	12.44	27575.3
gi_1034642177	400	11.82	41967.2
gi_663071186	68	11.51	7453.5
gi_16117787	117	11.95	13292.4
gi_1034642056	200	12.07	21190.5
gi_153285461	288	11.64	30768.6
gi_1034638029	54	12.71	6621.9
gi_23308541	157	12.29	17019.9
gi_1034642187	320	12.85	35202.8
gi_1034647240	353	11.98	38260.9
gi_1034645973	1342	11.66	148104
gi_767934533	169	11.87	19073
gi_530378712	226	12.51	24374.8
gi_30425549	138	11.9	15090
gi_4506641	97	12.22	11077.4
gi_1034646250	239	12.29	26005.6
gi_767937077	122	11.66	12771
gi_530380296	234	12.01	24428.5
gi_767935257	305	11.55	34109.8
gi_1034647089	426	11.86	43932.4
gi_1034643169	145	12.18	15506.6
gi_604723310	99	12.21	11667.3
gi_767938707	243	12.35	25347.4
gi_1034652795	215	11.75	22368.5
gi_1034650262	143	12.03	15931.2
gi_1034650934	129	11.7	15002.6
gi_258679535	96	11.77	10990.1
gi_4885373	215	11.52	21840.9
gi_21040357	76	12.36	8207.8
gi_20544168	207	12.2	22018
gi_4885379	219	11.55	21864
gi_4885377	221	11.55	22348.7
gi_4504319	98	11.53	11008.7
gi_323276655	78	12.2	8954
gi_6996016	77	12.19	7779.9
gi_4506901	164	12.12	19328.7
gi_1034653150	365	12.3	39170.7
gi_21265070	305	11.77	33299.5
gi_55769539	242	12.68	26112
gi_1034648115	84	11.93	9606.3
gi_1034653283	142	12.27	14472.7
gi_148612890	261	12.17	30510.5
gi_1034652720	110	12.14	12346
gi_1034652670	208	11.81	22698.9
gi_557355812	103	11.55	11834.7
gi_60302883	88	11.79	10060.8
gi_557357675	67	12.41	7894.1
gi_1034652672	529	11.93	56325.8
gi_58331144	295	11.56	30924.8
gi_1034653701	208	11.65	22877.7
gi_767944691	504	11.62	55147.8
gi_1034658006	431	11.53	46683.1
gi_1034658013	327	11.82	35075.9
gi_1034654367	466	12.39	47748
gi_767945347	219	12.09	25522.4
gi_9558733	282	11.72	32687
gi_767946335	126	12.02	13770.5
gi_578813761	115	11.94	12653.4
gi_767946036	278	11.57	29226.3
gi_1034655697	58	12.58	7161.3
gi_767945675	142	12.06	14834.6
gi_1034658275	216	12.51	23823.6
gi_1034658386	203	11.64	20822.1
gi_625180297	674	11.98	74152.7
gi_29126247	189	11.74	20817.6
gi_1034655465	255	11.86	27530.5
gi_57242766	235	12.19	26260.1
gi_546231611	482	11.75	52226.3
gi_767950216	212	12.05	23544
gi_767950210	298	12.01	33040.9
gi_126091042	108	11.5	11987.4
gi_1034662664	163	11.98	17939.1
gi_1034662657	218	12.15	24115.3
gi_767950325	147	11.93	15959.8
gi_1034662440	246	12.21	25871.7
gi_1034662767	123	12.62	12520.5
gi_1034662442	320	12.23	34147.6
gi_1034662444	402	12.63	42241.8
gi_1034662361	323	11.63	34586
gi_1034662446	263	11.95	28942
gi_648215965	61	11.75	6951
gi_336455078	101	11.85	11412.5
gi_767954030	238	12.08	24354.3
gi_1034662386	140	11.92	14621.8
gi_1034659729	1076	11.52	115466
gi_357394961	217	12.35	23156.9
gi_15431306	257	11.51	28023.6
gi_190014615	295	12.25	31182.7
gi_1034672316	323	11.7	33741.8
gi_300863096	132	12.89	13902.6
gi_17981696	78	12.14	8077.7
gi_51944974	212	11.66	23388.8
gi_89886261	115	12.61	13182.7
gi_1034672202	212	11.54	23898.7
gi_767959579	280	12.25	30566.6
gi_1034672868	250	12.07	25690.9
gi_558757315	148	11.84	15619.6
gi_148664228	256	12.41	27928.3
gi_5803165	96	12.04	9974
gi_1034672379	160	12.27	16401.5
gi_6005860	123	11.53	14551
gi_1034663792	198	11.61	20822.8
gi_1034663795	177	11.95	18677.1
gi_1034670297	100	11.91	10685
gi_525313672	197	12.06	21821.8
gi_1034673155	291	12.46	29110.6
gi_22749177	203	12.14	22153
gi_223646111	384	11.89	43127.8
gi_1034554199	240	12.29	25801.1
gi_767960759	189	11.89	20479.2
gi_1034570713	412	12.55	44603.9
gi_1034570806	215	12.89	22304.1
gi_1034568033	271	12.06	27354.5
gi_58219030	136	11.64	14849.9
gi_20302158	77	11.73	8777.9
gi_1034571446	209	12.51	22075.4
gi_1034571022	184	11.9	19345
gi_530393230	163	11.52	17511.5
gi_186700631	178	11.75	19957.1
gi_344313179	63	12.34	6667.2
gi_1034567808	366	11.86	40798.4
gi_13376335	257	12.17	26268.4
gi_1034571221	156	12.2	16664.2
gi_1034569405	268	12.29	29320.2
gi_974141118	146	11.96	15060.9
gi_1034567847	158	12.06	16328.3
gi_61676082	151	11.83	14521.6
gi_11345450	121	11.76	13015.6
gi_443287647	129	11.99	13371.5
gi_642945616	215	12.69	22841.3
gi_1034573161	627	11.63	66305.1
gi_1020738680	140	11.89	14856.2
gi_767966301	241	11.66	26947.9
gi_645912866	151	12.3	16722.7
gi_4885665	193	11.65	20183.7
gi_1034576687	119	11.64	12915.5
gi_554790405	123	12.01	14233.2
gi_210147598	115	11.95	13171.2
gi_1034576978	283	12.3	28753.2
gi_1034576516	236	11.94	24323.4
gi_1034571790	282	12.19	32285.8
gi_767970139	344	11.9	36139.1
gi_169790777	147	11.56	16115.6
gi_1034574892	146	12.01	15583.2
gi_1034574896	130	12.23	14130.6
gi_1034582583	368	12.81	36456.6
gi_16950607	128	11.75	15094.3
gi_767971402	104	11.51	12074.1
gi_767972728	223	12.16	24699.4
gi_41349482	331	11.86	32611.8
gi_209571537	416	12.12	40807.4
gi_1034579489	278	12.44	28603.5
gi_32401437	255	12.25	28114.6
gi_154800455	144	11.9	15892.7
gi_1034582974	104	11.77	11616.6
gi_1034577748	223	11.92	24357.5
gi_665506020	118	12.23	12713.9
gi_62912482	106	12.5	11455.4
gi_665506022	147	12.07	16422.9
gi_767976431	245	11.76	25746.9
gi_1034581449	206	11.63	21276.5
gi_767976529	207	11.94	21521.3
gi_746817439	83	11.52	8859.9
gi_1034582267	309	12.3	31819.6
gi_555290113	293	11.72	31133.9
gi_1034582138	91	12.23	9883.2
gi_50083281	611	12.23	68555.1
gi_767975164	405	11.91	47093.4
gi_530401729	435	11.81	50628.4
gi_507834130	365	11.89	38696.6
gi_1034582567	886	12.2	94209.4
gi_530401946	589	11.95	65910.8
gi_1034584916	102	11.92	12265.8
gi_1034585209	237	12.03	25436.7
gi_32698855	139	12.01	16361.5
gi_1034585650	205	11.95	22522.4
gi_767979126	278	12.4	27769.7
gi_1034585341	612	12.42	70746.9
gi_1034585845	522	12.03	55248.8
gi_1034585847	492	12.02	51353.2
gi_1034585853	330	12.47	36602.4
gi_767982959	257	12.32	26360.3
gi_444299622	279	11.62	30642.1
gi_1034587208	234	11.56	26350.6
gi_221218998	352	11.56	37555.9
gi_767982962	381	11.95	40934.8
gi_86991438	272	12.06	31262.3
gi_767981308	239	11.82	27338.2
gi_1034588754	392	12.23	41435
gi_1034588756	334	11.56	35908.9
gi_557129013	159	12.06	17703.9
gi_33667032	72	12.56	8128.3
gi_767981404	330	11.53	35243.4
gi_1034588760	431	12.23	46266.5
gi_530403730	177	12.34	19100.8
gi_556695443	160	11.68	18050.4
gi_13027644	240	11.68	24613
gi_90017700	161	12.37	17038.7
gi_299473797	380	11.52	39618.2
gi_315506973	170	12.09	18314.5
gi_315468041	133	12.44	14332.9
gi_1034592710	201	11.59	22380.3
gi_147903292	369	11.76	39741.9
gi_1034590555	364	11.54	38766.7
gi_767983899	260	11.77	27825.7
gi_71773819	65	11.52	7221.1
gi_16579885	427	11.55	47695.4
gi_1034593209	209	12.02	21334.7
gi_767986559	131	12.22	13868.4
gi_28872740	161	12.02	16902.8
gi_1034592932	210	11.62	21417
gi_61966733	402	11.56	40996.6
gi_1034596828	362	12.07	39650.5
gi_548962168	222	11.62	23352.9
gi_153281202	165	12.1	18047.2
gi_1034593419	305	12.33	34206.5
gi_118572613	2752	12.53	299599
gi_4885635	138	12.08	15640
gi_556503399	123	12.29	15291.7
gi_556503330	140	12.17	17105.6
gi_4506109	51	12.55	6822.7
gi_1034594191	198	12.16	21549.2
gi_1034595360	296	11.88	32361.2
gi_1034597526	256	12.31	27105.1
gi_1034596804	265	12.17	28523.4
gi_767989076	202	12.73	21537.5
gi_379642991	115	12.82	13104.6
gi_1034596623	178	11.52	19573.9
gi_1034596806	376	12.19	40249.1
gi_1034597151	216	11.94	22399.6
gi_767989458	131	12.02	15498.1
gi_767990784	295	11.73	32430.5
gi_767990105	524	12.9	51388.8
gi_1034596620	458	11.92	50102.9
gi_404501498	148	11.64	17703.3
gi_1034597379	172	11.86	17798.4
gi_15431295	211	12.13	24260.4
gi_341604770	164	12.06	18844.3
gi_578839160	270	12.47	27936.4
gi_1034554253	241	11.88	24689.6
gi_256542291	235	11.68	24131.2
gi_1034602554	146	12.81	15224.6
gi_157502220	118	12.05	12999.7
gi_165932383	212	11.66	23030.2
gi_767997267	272	11.81	29758.6
gi_372266180	198	12.63	21117.3
gi_1034602564	218	11.91	23192.4
gi_4506609	196	11.96	23465.1
gi_767993773	401	11.53	42618.3
gi_767994590	169	11.78	18264.9
gi_154350224	186	11.74	19483.1
gi_154350246	207	11.82	21856.8
gi_574957075	109	12.74	10499.2
gi_1034600801	221	12.34	25475
gi_1034599350	107	12.14	11567.1
gi_30425464	129	12.1	13989.9
gi_756761789	92	12.42	9400.3
gi_238776833	264	11.52	27556.4
gi_574957077	89	12.26	9077.2
gi_767997528	329	11.54	36077.5
gi_270265904	123	12.52	13401
gi_5902102	119	12.05	13281.1
gi_632794837	78	12.29	8601.7
gi_767999584	204	12.64	21502.2
gi_68509930	197	11.82	21492.3
gi_1034605484	232	12.69	24692.8
gi_1034605500	220	12.53	23900.6
gi_1034605520	308	11.96	32917
gi_664806104	165	12.51	18204.3
gi_10190672	170	12.28	19661.8
gi_1034609792	226	11.6	23796
gi_1034610337	350	11.97	37111.9
gi_768002876	537	12.1	59772.2
gi_339276047	216	12.56	23003.2
gi_392841216	204	12.05	21398.5
gi_16117794	105	12.07	12253.2
gi_211059437	208	11.95	22974.8
gi_768000465	435	12.06	46745.4
gi_768000470	342	12.17	35275.9
gi_305410860	316	12.2	32817.3
gi_768000476	304	12.29	31490.4
gi_768005195	149	12.19	16241.3
gi_7661742	99	12.05	10576.1
gi_38505194	402	12.2	41799.5
gi_13027606	92	12.73	10164.5
gi_1034609429	198	11.95	20471.6
gi_768011003	299	11.75	31451.7
gi_111038124	115	11.98	12789.8
gi_224548936	715	12.53	80350.6
gi_1034607714	542	11.54	57450.8
gi_1034607716	466	11.73	50823.4
gi_768009409	454	11.51	48916.2
gi_187829730	261	12.46	26496.9
gi_4506607	188	12.21	21633.6
gi_1034608939	105	11.97	12020.4
gi_153251245	129	12.48	13749.6
gi_30425368	100	12.31	11201.9
gi_1034609649	176	11.97	19132.1
gi_299782483	176	12.01	18039.1
gi_13904866	137	12.49	15746.9
gi_768009487	225	12.42	24881.8
gi_768013455	430	12.11	45696.8
gi_4504057	120	11.6	12917.1
gi_1023300955	110	12.26	11995.3
gi_1034626696	153	12.36	17182.1
gi_1034626189	420	12.3	44136.3
gi_1034626415	211	12.36	21234.3
gi_292658849	194	12.22	21158.5
gi_18250302	153	11.95	17213.2
gi_34452736	71	11.74	7763.1
gi_1034626191	205	12.37	21931.7
gi_319655725	242	11.98	26410.8
gi_32307136	54	11.76	6153
gi_20127499	344	11.9	39584.8
gi_1034625617	218	11.64	23520
gi_1034626193	263	12.73	29139.1
gi_117938768	626	12.03	67944.9
gi_768019409	211	11.65	22136.5
gi_787166961	176	11.74	18096.7
gi_1005261188	144	12.16	15423.7
gi_768022577	162	11.99	17314.3
gi_17158023	230	11.56	25455.1
gi_1034627353	254	12.4	28681.6
gi_1034627351	302	11.7	33462.8
gi_930155612	79	11.67	8936.2
gi_23110980	84	12.78	8573.4
gi_1034628311	303	11.79	34158.1
gi_1034628315	283	11.68	31860.5
gi_380418324	88	12.01	9562.4
gi_768030779	223	12.31	23901.3
gi_1034628454	101	11.58	11822.1
gi_1034629018	100	12.43	11293.8
gi_49355807	239	11.66	26152.9
gi_8922785	138	12.9	14717.4
gi_1034630475	454	12.28	47097.4
gi_1034629440	148	12.29	15864.7
gi_768031844	278	11.75	30475.5
gi_1034675888	365	12.22	37267.2
gi_576795924	135	12.72	14288.4
gi_1034675894	267	11.54	27704.5
gi_532164743	258	11.55	27294.4
gi_768038632	189	12.51	20033.8
gi_45120090	77	12.31	8568.8
gi_283046657	96	12.41	10761.8
gi_1034676157	324	12.17	34527.2
gi_1034676928	409	11.73	44555.7
gi_194272171	122	11.54	11541.1
gi_1034677027	167	12.37	16683.7
gi_530432835	135	11.61	15107.2
gi_1034678800	427	12.32	45262.1
gi_1034678216	319	11.69	35392.7
gi_1034678214	360	11.64	40378.8
gi_1034679186	212	12.42	22349.8
gi_1034687941	349	12.77	39356
gi_578843192	282	12.09	29765.8
gi_1034689356	210	12.48	23021.4
gi_1034691979	249	12.1	27657.2
gi_767881720	366	12.59	38926.3
gi_1034693501	438	11.51	47092.9
gi_1034696415	271	12.45	29295.2
gi_767887167	399	12	41611.9
gi_1034695955	544	12.7	58186.5
gi_1034697177	416	11.87	44729.2
gi_1034696999	408	12.15	42820.8
gi_767890309	311	12.43	33966.3
gi_1034698108	161	12.37	16738.7
gi_767890407	212	11.74	22931.9
gi_1034680556	161	12.09	16851.7
gi_1034682657	154	11.7	16309.9
gi_1034682334	432	11.84	44583.5
gi_1034682338	562	11.93	61058.2
gi_1034683046	337	12.07	34959.7
gi_1034683355	344	12.03	36320.6
gi_767894667	364	12.12	38208.7
gi_1034683716	475	12.14	51546.4
gi_1034684045	423	11.77	44945
gi_1034685023	150	12.32	15531.1
gi_767896274	152	12.48	15821.5
gi_1034687773	160	12.15	17233.7
gi_1034689964	136	12.73	14322.6
gi_1034690622	224	12.27	24418.9
gi_1034690297	192	11.69	21650.8
gi_767900801	225	12.62	23705.2
gi_1034699300	436	11.92	46203.4
